# Supplementary material for: Block copolymer assisted synthesis of bimetallic colloids with Au core and nanodendritic Pt shell
Source: Royal Society of Chemistry journal article supplement (doi:10.1039/c001516d), 2010-01-01
Supplement: c001516d.pdf [file c001516d.pdf]

## Electronic Supplementary Information (ESI)

Figure S1

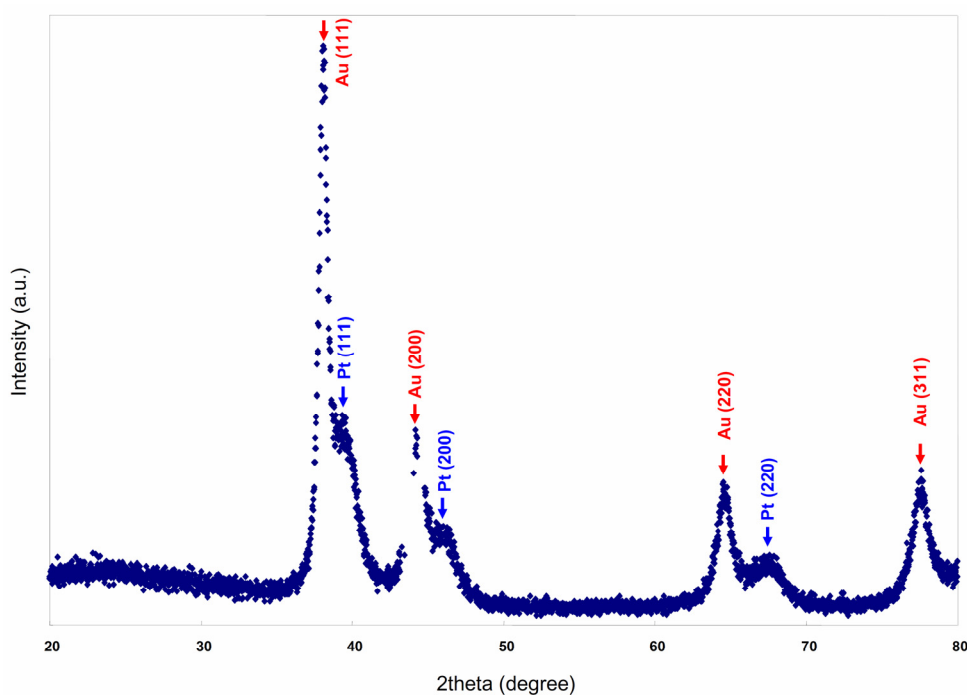

**Figure S1.** Wide-angle XRD pattern of the bimetallic colloids (Au@Pt) prepared under the typical 5 condition.

**Figure S2**

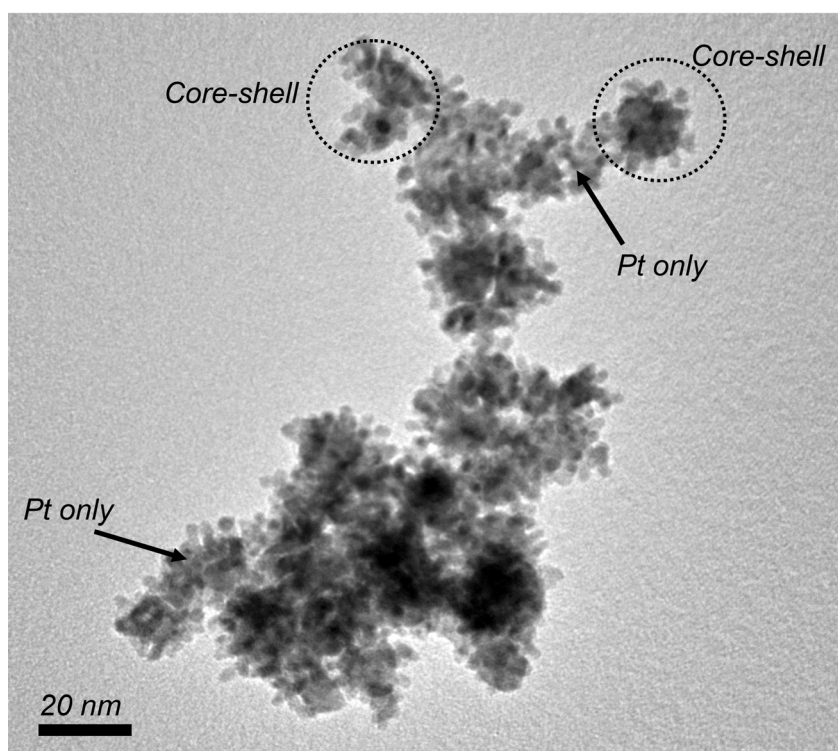

**Figure S2** TEM image of the product prepared by using the solution with the large amount of the Pt sources. The compositional mole ratio of Pt/Au in this solution is 2.0. A mixture of core-shell 5 particles and dendritic Pt particles without Au cores was observed.

**Figure S3**

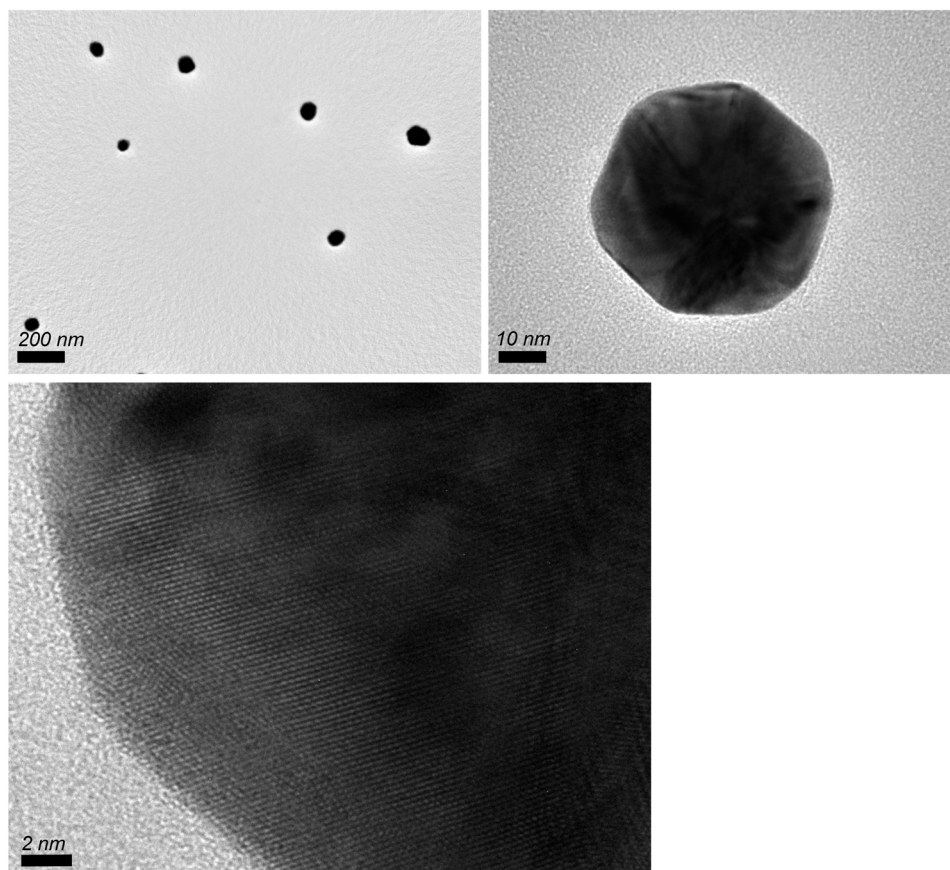

**Figure S3** TEM image of the Au particles prepared by using the solution without Pt sources. Figure (c) is highly magnified TEM image. No nanostructures were observed inside the Au particles.
